# Supplementary material for: Mmi1, the Yeast Ortholog of Mammalian Translationally Controlled Tumor Protein (TCTP), Negatively Affects Rapamycin-Induced Autophagy in Post-Diauxic Growth Phase
Source: PubMed Central journal article supplement (PMC7017036; doi:10.3390/cells9010138), 2020-01-07
Supplement: cells-09-00138-s001.pdf [file cells-09-00138-s001.pdf]

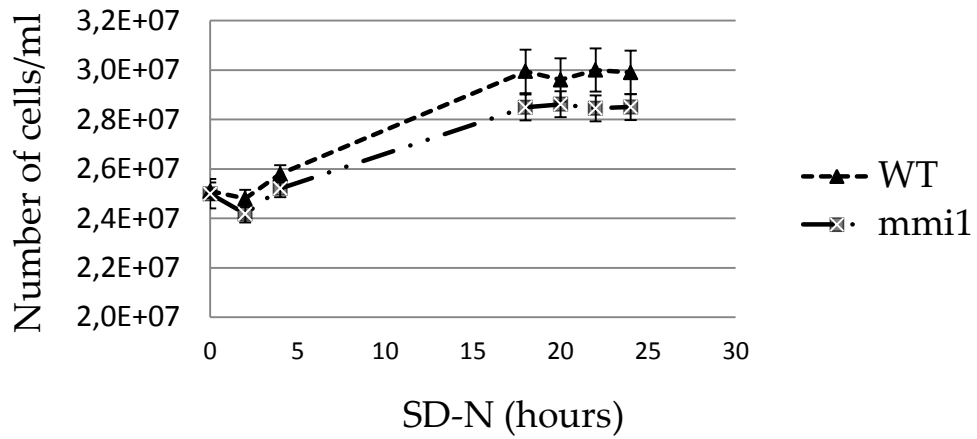

**Figure S1.** Growth of WT and *mmi1*Δ strains in nitrogen starvation media. Exponentially growing WT and *mmi1*Δ strain (OD ≈ 0.8) were shifted from YPD to SD-N media. Number of cells per ml was determined at indicated time points. Results are means ± SD (n=3).
